# Supplementary material
Source: ML conference proceedings conference paper supplement (https://proceedings.neurips.cc/paper_files/paper/2022/hash/c6875cb36db4ba791b3c388881f31788-Abstract.html)
Supplement: Supplementary file 1 [file c6875cb36db4ba791b3c388881f31788-Supplemental-Conference.pdf]

## A Proof of Lemma 1

*Proof.* In an optimal translational model  $\mathcal{T}$ , for any valid  $(h, r, t)$  we have:

$$\text{trans}_r(\text{emb}(h)) = \text{emb}(t) \quad (18)$$

According to the definition of prototypes, an entity  $p$  is the prototype for  $(h, r, ?)$  if and only if:

$$\text{trans}_r(\text{emb}(h)) = \text{trans}_r(\text{emb}(p)) \quad (19)$$

□

## B Proof of Lemma 2

*Proof.* Recall that the margin loss of  $\mathcal{T}^\theta$  with margin  $\gamma$  is:

$$\mathcal{L} = -\max(\gamma - \mathcal{T}^\theta(h, r, t), 0) + \sum_{i=1}^n \frac{1}{n} \max(\gamma - \mathcal{T}^\theta(h'_i, r, t'_i), 0) \quad (20)$$

where  $(h'_i, r, t'_i)$  is the  $i$ -th negative triplet.

If the global minimum of the loss is achieved, then for any positive  $(h, r, t)$ , we have:

$$\max(\gamma - \mathcal{T}^\theta_{hr}(t), 0) = \gamma \Rightarrow \mathcal{T}^\theta_{hr}(t) = 0 \quad (21)$$

for any negative  $(h, r, t_{\text{neg}})$ , we have:

$$\max(\gamma - \mathcal{T}^\theta_{hr}(t_{\text{neg}}), 0) = 0 \Rightarrow \mathcal{T}^\theta_{hr}(t_{\text{neg}}) \geq \gamma \quad (22)$$

Then for the positive prototype  $p$  of  $(h, r, t)$ , we have:

$$f_{hr}(p) = \gamma \quad (23)$$

For the negative prototype  $p_{\text{neg}}$  of  $(h, r, t)$ , we have:

$$f_{hr}(p_{\text{neg}}) = 0 \quad (24)$$

With Eq. (8), the score of an candidate tail  $t'$  is:

$$\mathcal{I}^\theta_{hr}(t') = \begin{cases} 1 & (h, r, t') \text{ is positive} \\ 0 & \text{otherwise.} \end{cases} \quad (25)$$

And the cross-entropy loss for  $\mathcal{I}^\theta$  is minimized. □

## C Proof of Theorem 2

*Proof.* In an optimal TransE model, for all entities  $a, b, c, d$  that satisfy the premise of the IBL rule (i.e.  $(a, r_0, b), (b, r_1, c), (c, r_1^{-1}, d) \in \text{KB}$ ), we have

$$\|e_a + r_0 - e_b\| = 0, \|e_b + r_1 - e_c\| = 0, \|e_c + r_1^{-1} - e_d\| = 0$$

Therefore,  $e_d = e_a + r_0$ ,  $\|e_a + r_0 - e_d\| = 0$ .

As a result,  $(a, r_0, d) \in \text{KB}$ , which indicates that the hypothesis of the IBL rule also holds. So the IBL rule  $r_0 \wedge r_1 \wedge r_1^{-1} \implies r_0$  always holds. □

## D Hyperparameters

We search hyperparameters from the following range: learning rate  $l \in \{1 \times 10^{-5}, 2 \times 10^{-5}, 5 \times 10^{-5}, 1 \times 10^{-4}, 2 \times 10^{-4}, 5 \times 10^{-4}\}$ , batch size  $b \in \{8, 16, 32, 64, 128, 256, 512, 1024\}$ , dimension of embedding  $d \in \{200, 500, 1000, 2000\}$ , and margin  $\gamma \in \{3, 6, 9, 12, 15, 18\}$ . We use wandb<sup>3</sup> to search for best hyperparameters.

## E Dataset Statistics

We summarize the number of entities, relations and examples in each split for four benchmarks in our experiments in Table 10.

---

<sup>3</sup><https://wandb.ai/home>

Table 10: Dataset statistics.

| Dataset   | #Entities | #Relations | #Train  | #Validation | #Test  |
|-----------|-----------|------------|---------|-------------|--------|
| FB15k-237 | 14,541    | 237        | 272,115 | 17,535      | 20,466 |
| WN18RR    | 40,943    | 11         | 86,835  | 3,034       | 3,134  |
| Kinship   | 104       | 25         | 3,206   | 2,137       | 5,343  |
| UMLS      | 135       | 46         | 1,959   | 1,306       | 3,264  |
